# Supplementary material for: Angiogenic Activity of Breast Cancer Patients’ Monocytes Reverted by Combined Use of Systems Modeling and Experimental Approaches
Source: PLoS Comput Biol. 2015 Mar 13;11(3):e1004050. doi: 10.1371/journal.pcbi.1004050 (PMC4359163; doi:10.1371/journal.pcbi.1004050)
Supplement: S4 Table — All the links retained for the construction of TEM dynamical regulatory network are shown. (XLS) [file pcbi.1004050.s008.xls]

## Sheet: supplementary_table4
	Supplementary Table 4	TEM i.e. DP cells (CD11b+ CD14+)
	Treatment	Receptor	variation	Cytokine	variation
	VEGF + TGF	TNFR1	down	IL6	up
	PlGF + TGF	TNFR1	up	IL6	down
	Ang-2 + TGF	CD11b	down	IL8	down
	Ang-2 + TGF	VEGFR1	down	IL8	down
	VEGF + TNF	TGFR1	down	IL8	up
	Ang-2 + TGF	TGFR1	up	IL8	down
	VEGF + TNF	TNFR1	down	IL8	up
	TGF	CCR5	down	IL8	down
	TGF	Tie2	up	IL8	down
	VEGF + TNF	Tie2	down	IL8	up
	Ang-2 + TGF	CD11b	down	MCP1	up
	Ang-2 + TGF	VEGFR1	down	MCP1	up
	VEGF + TNF	CD14	down	MCP1	down
	VEGF + TNF	TGFR1	down	MCP1	down
	Ang-2 + TGF	TGFR1	up	MCP1	up
	VEGF + TNF	TNFR1	down	MCP1	down
	PlGF + TNF	CCR5	up	MCP1	up
	VEGF + TNF	Tie2	down	MCP1	down
	PlGF + TNF	Tie2	up	MCP1	up
	Ang-2 + TGF	CD11b	down	MMP9	up
	PlGF	TNFR1	up	MMP9	up
	Ang-2 + TGF	CD11b	down	IL12	down
	Ang-2 + TGF	VEGFR1	down	IL12	down
	VEGF + TNF	TGFR1	down	IL12	up
	Ang-2 + TGF	TGFR1	up	IL12	down
	VEGF + TNF	TNFR1	down	IL12	up
	PlGF	TNFR1	up	IL12	down
	VEGF + TNF	Tie2	down	IL12	up
	PlGF	Tie2	up	IL12	down
	PlGF + TNF	Tie2	up	IL12	down
	VEGF + TGF	CD11b	down	TNFa	down
	VEGF + TGF	VEGFR1	down	TNFa	down
	Ang-1	CD14	up	TNFa	up
	VEGF + TGF	CD14	down	TNFa	down
	VEGF + TGF	TNFR1	down	TNFa	down
	PlGF	TNFR1	up	TNFa	up
	PlGF	CCR5	down	TNFa	up
	PlGF + TNF	CCR5	up	TNFa	down
	PlGF + TGF	CD11b	down	IL1b	down
	PlGF + TGF	VEGFR1	down	IL1b	down
	VEGF + TNF	TGFR1	down	IL1b	up
	VEGF + TNF	TNFR1	down	IL1b	up
	PlGF + TGF	TNFR1	up	IL1b	down
	PlGF + TGF	CCR5	up	IL1b	down
	PlGF + TNF	CCR5	up	IL1b	down
	VEGF + TNF	Tie2	down	IL1b	up
	PlGF + TGF	Tie2	up	IL1b	down
	PlGF + TNF	Tie2	up	IL1b	down
	Ang-2 + TGF	CD11b	down	IL18	down
	Ang-2 + TGF	VEGFR1	down	IL18	down
	VEGF + TNF	CD14	down	IL18	up
	VEGF + TNF	TGFR1	down	IL18	up
	Ang-2 + TGF	TGFR1	up	IL18	down
	VEGF + TNF	TNFR1	down	IL18	up
	PlGF + TNF	CCR5	up	IL18	down
	VEGF + TNF	Tie2	down	IL18	up
	PlGF + TNF	Tie2	up	IL18	down
	Ang-1	CD14	up	VEGF	up
	PlGF + TGF	CD14	up	VEGF	up
	Ang-2 + TGF	TGFR1	up	VEGF	down
	PlGF + TGF	TNFR1	up	VEGF	up
	PlGF + TGF	Tie2	up	VEGF	up
	PlGF + TGF	VEGFR1	down	PlGF	up
	Ang-2 + TGF	VEGFR1	down	PlGF	up
	TGF	CD14	down	PlGF	down
	PlGF + TGF	CD14	up	PlGF	up
	Ang-2 + TGF	TGFR1	up	PlGF	up
	PlGF	TNFR1	up	PlGF	up
	PlGF + TGF	TNFR1	up	PlGF	up
	VEGF + TGF	CD11b	down	Ang-1	up
	PlGF + TGF	CD11b	down	Ang-1	up
	VEGF + TGF	VEGFR1	down	Ang-1	up
	PlGF + TGF	VEGFR1	down	Ang-1	up
